# Supplementary material for: The spatial RNA integrity number assay for in situ evaluation of transcriptome quality
Source: PubMed Central journal article supplement (PMC7794352; doi:10.1038/s42003-020-01573-1), 2021-01-08
Supplement: 42003_2020_1573_MOESM3_ESM.pdf [file 42003_2020_1573_MOESM3_ESM.pdf]

Description of additional supplementary file

**File Name:** Supplementary\_Data\_1

**Description:** Data used to generate graphs and charts shown in Supplementary Figures: 1b, 2, 3, 4, and 5f.
